# Supplementary material for: Substituent dependence on the spin crossover behaviour of mononuclear Fe(ii) complexes with asymmetric tridentate ligands
Source: Royal Society of Chemistry journal article supplement (doi:10.1039/c9dt00204a), 2019-01-01
Supplement: c9dt00204a1.pdf [file c9dt00204a1.pdf]

## Supporting Information

### Substituent dependence on the spin crossover behaviour of mononuclear Fe(II) complexes with asymmetric tridentate ligands

Ryo Saiki,<sup>a</sup> Haruka Miyamoto,<sup>a</sup> Hajime Sagayama,<sup>c</sup> Reiji Kumai,<sup>c</sup> Graham N.  
Newton,<sup>b</sup> Takuya Shiga,<sup>\*a</sup> and Hiroki Oshio<sup>\*a</sup>

- a. Graduate School of Pure and Applied Sciences, University of Tsukuba, Tennodai 1-1-1, Tsukuba, Ibaraki 305-8571, Japan.
- b. GSK Carbon Neutral Laboratories for Sustainable Chemistry, The University of Nottingham, Nottingham NG7 2TU, U.K.
- c. Photon Factory and Condensed Matter Research Center, Institute of Materials Structure Science, High Energy Accelerator Research Organization (KEK), Oho 1-1, Tsukuba, Ibaraki 305-0801, Japan.

Corresponding authors

Dr. T. Shiga and Prof. H. Oshio  
Graduate School of Pure and Applied Sciences,  
University of Tsukuba  
Tennodai 1-1-1, Tsukuba, Ibaraki 305-8571 (Japan)  
FAX: (+81)29-852-5923 and 4238  
E-mail: shiga@chem.tsukuba.ac.jp, oshio@chem.tsukuba.ac.jp

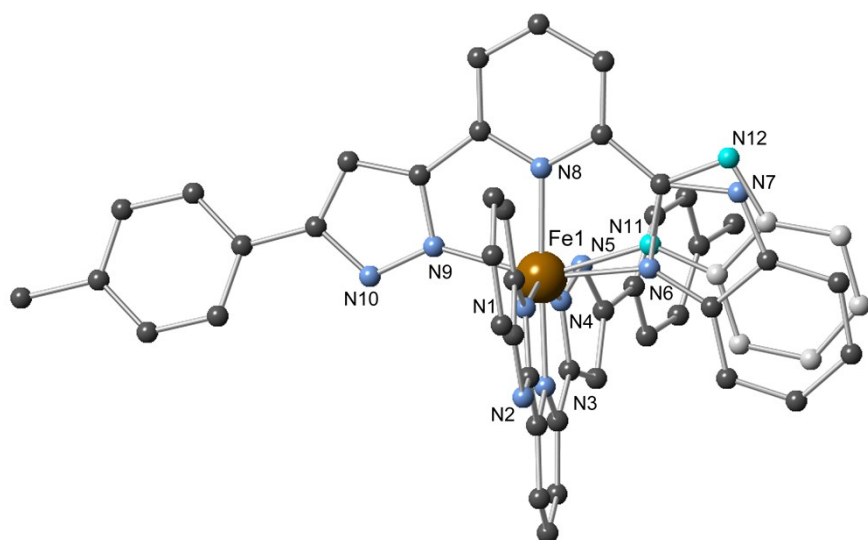

**Figure S1.** Molecular structure of **1'** at 100 K showing disorder of ligands.

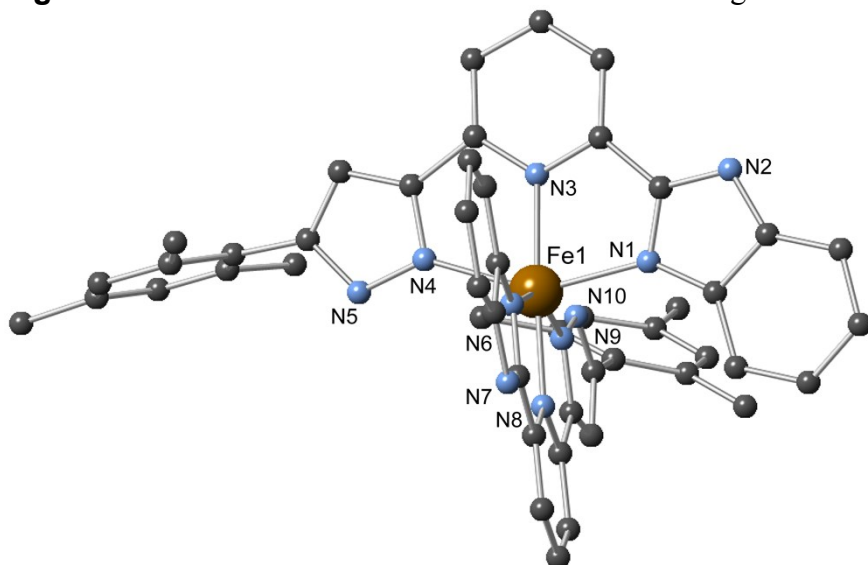

**Figure S2.** Molecular structure of **2'** at 100 K.

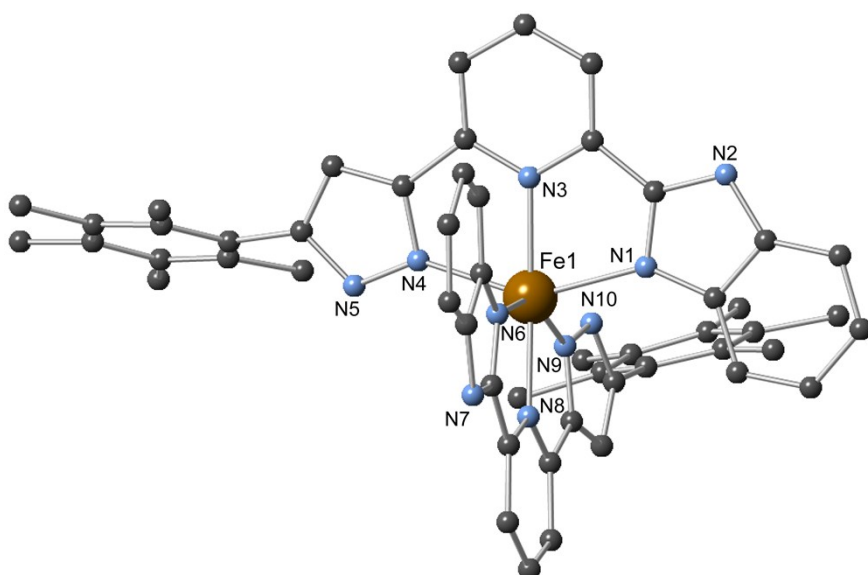

**Figure S3.** Molecular structure of **3'** at 100 K.

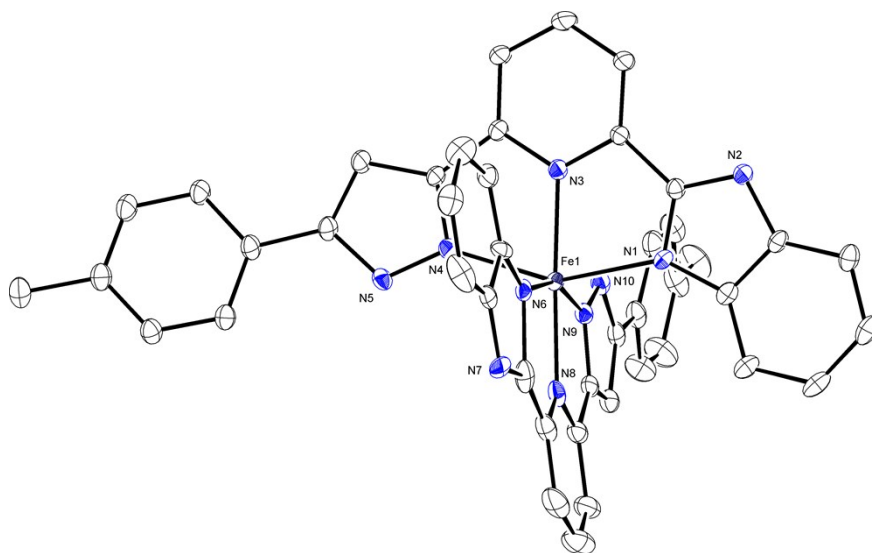

**Figure S4.** Molecular structure of **1'** at 100 K.

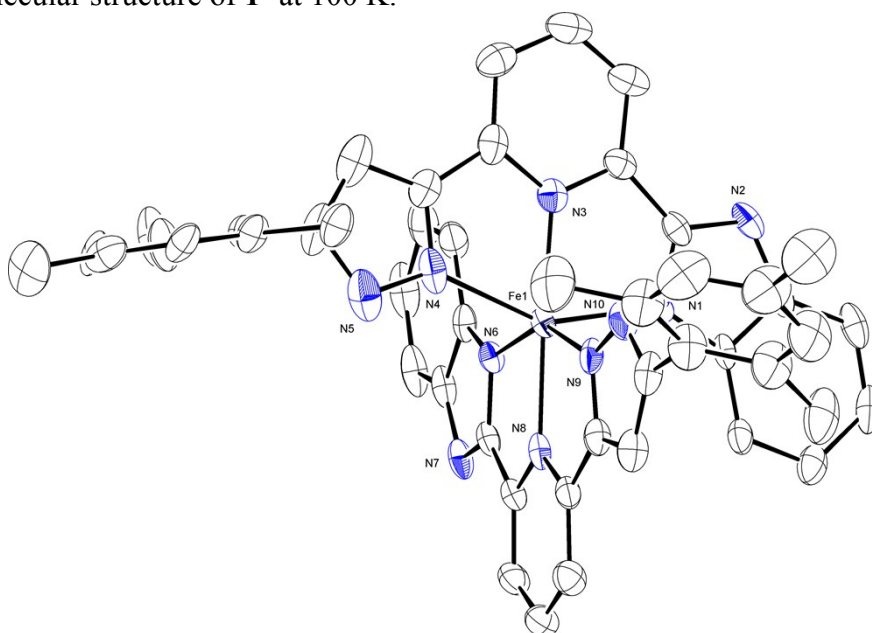

**Figure S5.** Molecular structure of **2'** at 100 K.

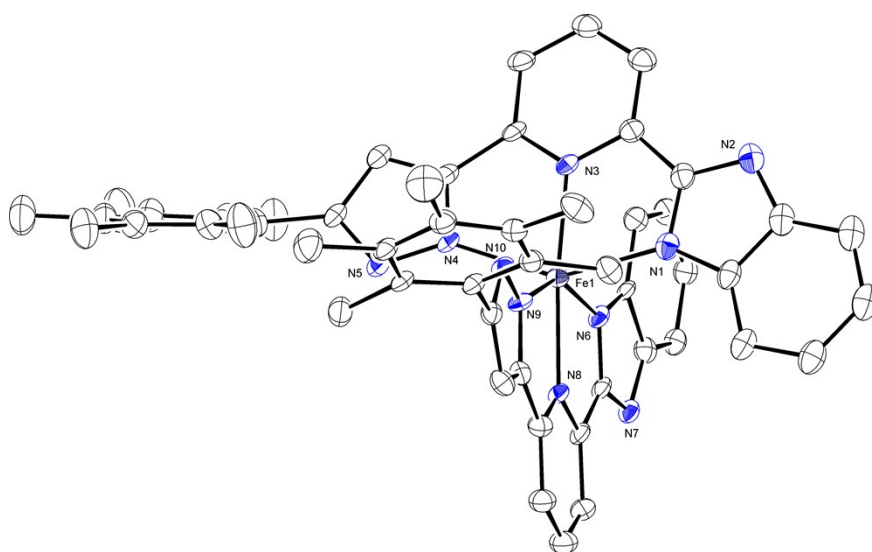

**Figure S6.** Molecular structure of **3'** at 100 K.

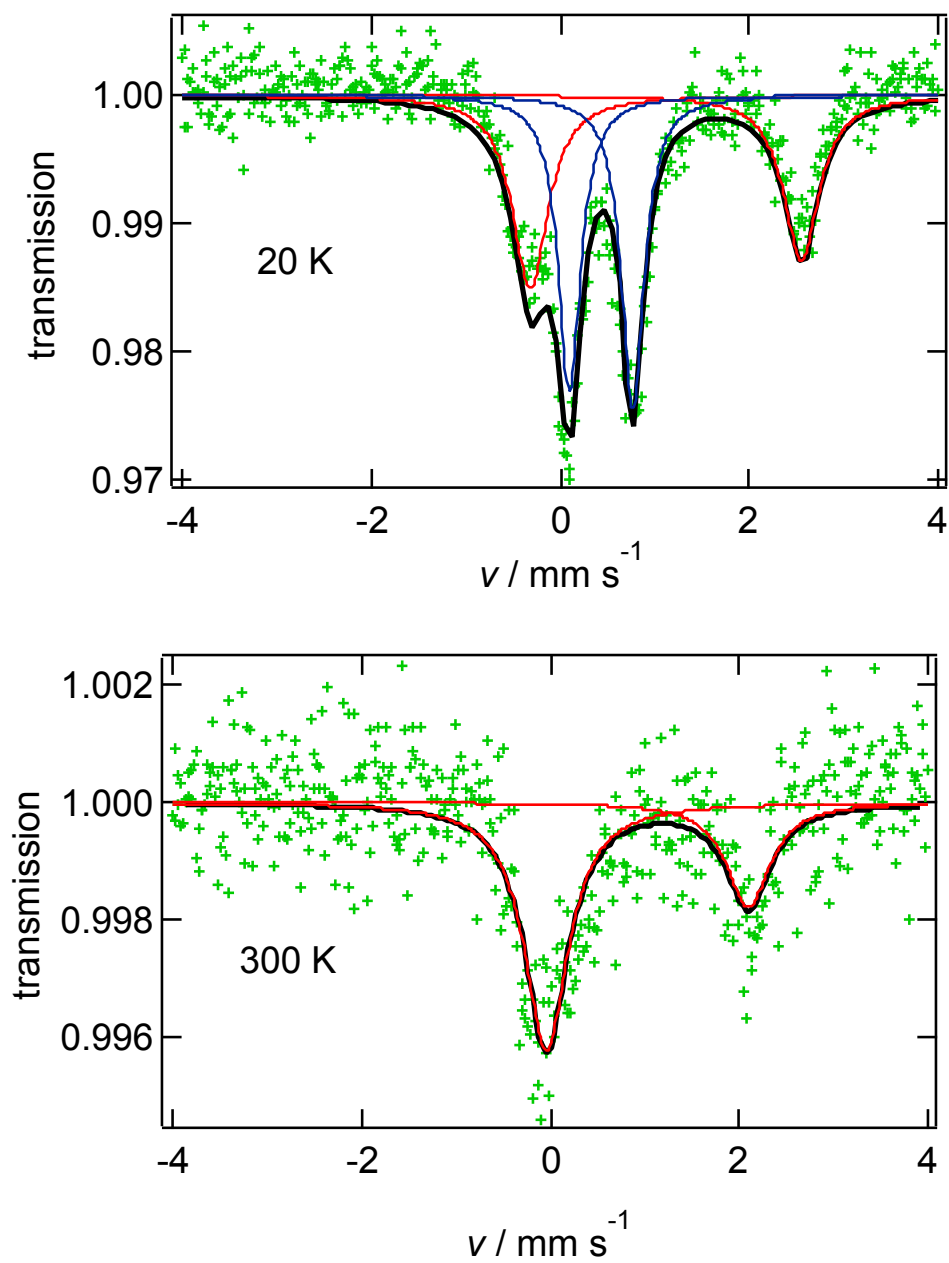

**Figure S7.** Mössbauer spectra of **1** at 20 K (top) and 300 K (bottom).

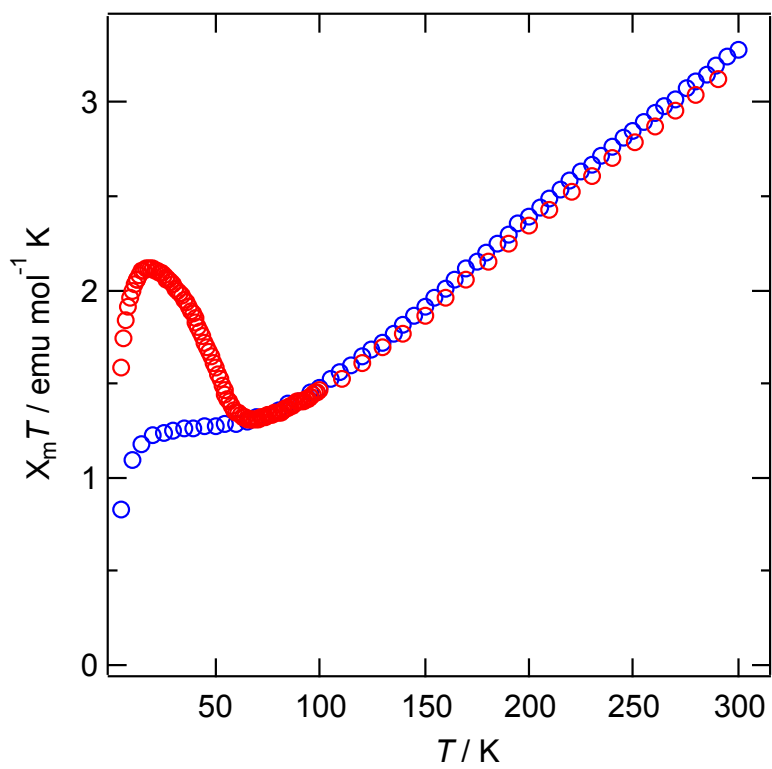

**Figure S8.** LIESST behavior of **1**.

**Table S1.** Crystal parameters of **1'**.

|                                                      | 20 K                                                                                               | 100 K                                                                                              | 270 K                                                                                              | LIESST                                                                                             |
|------------------------------------------------------|----------------------------------------------------------------------------------------------------|----------------------------------------------------------------------------------------------------|----------------------------------------------------------------------------------------------------|----------------------------------------------------------------------------------------------------|
| Formula                                              | C <sub>52</sub> H <sub>52</sub> N <sub>10</sub><br>O <sub>4</sub> B <sub>2</sub> F <sub>8</sub> Fe | C <sub>52</sub> H <sub>52</sub> N <sub>10</sub><br>O <sub>3</sub> B <sub>2</sub> F <sub>8</sub> Fe | C <sub>52</sub> H <sub>56</sub> N <sub>10</sub><br>O <sub>3</sub> B <sub>2</sub> F <sub>8</sub> Fe | C <sub>52</sub> H <sub>52</sub> N <sub>10</sub><br>O <sub>4</sub> B <sub>2</sub> F <sub>8</sub> Fe |
| M / g mol <sup>-1</sup>                              | 1110.50                                                                                            | 1094.50                                                                                            | 1098.53                                                                                            | 1110.50                                                                                            |
| Temp. / K                                            | 20(2)                                                                                              | 100(2)                                                                                             | 100(2)                                                                                             | 20(2)                                                                                              |
| Crystal system                                       | Monoclinic                                                                                         | Monoclinic                                                                                         | Monoclinic                                                                                         | Monoclinic                                                                                         |
| Space group                                          | <i>C2/c</i>                                                                                        | <i>C2/c</i>                                                                                        | <i>C2/c</i>                                                                                        | <i>C2/c</i>                                                                                        |
| <i>a</i> / Å                                         | 31.8358(9)                                                                                         | 32.019(3)                                                                                          | 32.372(12)                                                                                         | 32.0647(13)                                                                                        |
| <i>b</i> / Å                                         | 16.2318(6)                                                                                         | 16.3126(14)                                                                                        | 16.452(6)                                                                                          | 16.2520(5)                                                                                         |
| <i>c</i> / Å                                         | 24.1500(13)                                                                                        | 24.246(2)                                                                                          | 24.557(16)                                                                                         | 24.1773(17)                                                                                        |
| $\alpha$ / °                                         | -                                                                                                  | -                                                                                                  | -                                                                                                  | -                                                                                                  |
| $\beta$ / °                                          | 121.0380(10)                                                                                       | 121.2070(10)                                                                                       | 121.401(4)                                                                                         | 121.5440(10)                                                                                       |
| $\gamma$ / °                                         | -                                                                                                  | -                                                                                                  | -                                                                                                  | -                                                                                                  |
| <i>V</i> / Å <sup>3</sup>                            | 10692.8(8)                                                                                         | 10831.7(16)                                                                                        | 11164(9)                                                                                           | 10737.5(9)                                                                                         |
| <i>Z</i>                                             | 8                                                                                                  | 8                                                                                                  | 8                                                                                                  | 8                                                                                                  |
| <i>d</i> / g cm <sup>-3</sup>                        | 1.380                                                                                              | 1.342                                                                                              | 1.307                                                                                              | 1.374                                                                                              |
| $\mu$ / mm <sup>-1</sup>                             | 0.889                                                                                              | 0.357                                                                                              | 0.347                                                                                              | 0.886                                                                                              |
| F(000)                                               | 4592                                                                                               | 4528                                                                                               | 4560                                                                                               | 4592                                                                                               |
| Reflections                                          |                                                                                                    |                                                                                                    |                                                                                                    |                                                                                                    |
| collected / unique                                   | 18898 / 7220                                                                                       | 31295 / 12376                                                                                      | 32071 / 12718                                                                                      | 21855 / 8554                                                                                       |
| <i>R</i> <sub>int</sub>                              | 0.2033                                                                                             | 0.0603                                                                                             | 0.0534                                                                                             | 0.1017                                                                                             |
| GOF                                                  | 1.092                                                                                              | 1.022                                                                                              | 1.030                                                                                              | 1.219                                                                                              |
| <i>R</i> <sub>1</sub> ( <i>I</i> > 2σ( <i>I</i> ))   | 0.1007                                                                                             | 0.0858                                                                                             | 0.0689                                                                                             | 0.1189                                                                                             |
| <i>R</i> <sub>w</sub> 2 ( <i>I</i> > 2σ( <i>I</i> )) | 0.2814                                                                                             | 0.2272                                                                                             | 0.1892                                                                                             | 0.3245                                                                                             |
| $\Delta\rho_{\max}$ / e Å <sup>-3</sup>              | 1.101                                                                                              | 1.842                                                                                              | 0.875                                                                                              | 1.481                                                                                              |
| $\Delta\rho_{\min}$ / e Å <sup>-3</sup>              | -0.704                                                                                             | -0.641                                                                                             | -0.497                                                                                             | -1.167                                                                                             |
| CCDC No.                                             | 1889870                                                                                            | 1889871                                                                                            | 1889872                                                                                            | 1889873                                                                                            |

**Table S2.** Crystal parameters of **2'** and **3'**.

|                                                      | Comp. <b>2'</b> (100 K)                                                                                                | Comp. <b>3'</b> (100 K)                                                                            |
|------------------------------------------------------|------------------------------------------------------------------------------------------------------------------------|----------------------------------------------------------------------------------------------------|
| Formula                                              | C <sub>53.5</sub> H <sub>56</sub> N <sub>10</sub><br>O <sub>3.5</sub> N <sub>10</sub> B <sub>2</sub> F <sub>8</sub> Fe | C <sub>64</sub> H <sub>78</sub> N <sub>10</sub><br>O <sub>2</sub> B <sub>2</sub> F <sub>8</sub> Fe |
| M / g mol <sup>-1</sup>                              | 1124.55                                                                                                                | 1248.83                                                                                            |
| Temp. / K                                            | 100(2)                                                                                                                 | 100(2)                                                                                             |
| Crystal system                                       | Triclinic                                                                                                              | Monoclinic                                                                                         |
| Space group                                          | <i>P</i> Error!                                                                                                        | <i>P</i> 2 <sub>1</sub> /n                                                                         |
| <i>a</i> / Å                                         | 12.496(10)                                                                                                             | 18.389(3)                                                                                          |
| <i>b</i> / Å                                         | 12.836(10)                                                                                                             | 16.551(3)                                                                                          |
| <i>c</i> / Å                                         | 17.661(14)                                                                                                             | 22.333(3)                                                                                          |
| $\alpha$ / °                                         | 85.769(8)                                                                                                              | -                                                                                                  |
| $\beta$ / °                                          | 73.318(11)                                                                                                             | 112.772(2)                                                                                         |
| $\gamma$ / °                                         | 84.140(11)                                                                                                             | -                                                                                                  |
| <i>V</i> / Å <sup>3</sup>                            | 2696(4)                                                                                                                | 6267.2(16)                                                                                         |
| <i>Z</i>                                             | 2                                                                                                                      | 4                                                                                                  |
| <i>d</i> / g cm <sup>-3</sup>                        | 1.385                                                                                                                  | 1.324                                                                                              |
| $\mu$ / mm <sup>-1</sup>                             | 0.362                                                                                                                  | 0.317                                                                                              |
| F(000)                                               | 1166                                                                                                                   | 2624                                                                                               |
| Reflections                                          |                                                                                                                        |                                                                                                    |
| collected / unique                                   | 12605 / 9703                                                                                                           | 34769 / 14330                                                                                      |
| <i>R</i> <sub>int</sub>                              | 0.0371                                                                                                                 | 0.0767                                                                                             |
| GOF                                                  | 1.069                                                                                                                  | 1.252                                                                                              |
| <i>R</i> 1 ( <i>I</i> > 2σ( <i>I</i> ))              | 0.1422                                                                                                                 | 0.1335                                                                                             |
| <i>R</i> <sub>w</sub> 2 ( <i>I</i> > 2σ( <i>I</i> )) | 0.3343                                                                                                                 | 0.2993                                                                                             |
| $\Delta\rho_{\max}$ / e Å <sup>-3</sup>              | 2.092                                                                                                                  | 2.498                                                                                              |
| $\Delta\rho_{\min}$ / e Å <sup>-3</sup>              | -0.923                                                                                                                 | -1.744                                                                                             |
| CCDC No.                                             | 1889874                                                                                                                | 1889875                                                                                            |

**Table S3.** Mössbauer parameters for **1'** at 20 K.

| $\delta_{IS}$ (mm / s) | $\Delta E_Q$ (mm / s) | spin state | Area fraction (%) |
|------------------------|-----------------------|------------|-------------------|
| 0.435                  | 0.670                 | Fe(II)LS   | 51.0              |
| 1.119                  | 2.870                 | Fe(II)HS   | 49.0              |

**Table S4.** Mössbauer parameters for **1'** at 300 K.

| $\delta_{IS}$ (mm / s) | $\Delta E_Q$ (mm / s) | spin state |
|------------------------|-----------------------|------------|
| 1.028                  | 2.140                 | Fe(II) HS  |

## Syntheses of ligands

Non-substituted tridentate ligand,  $H_2L$ , was synthesized by the following procedure described in reference S1, which shown in Scheme S1. New Asymmetric tridentate ligands,  $H_2L^{1-3}$ , were synthesized following a protocol adapted from our previous study.<sup>[S1]</sup> Recrystallization methods, yield and characterization data were described as follows.

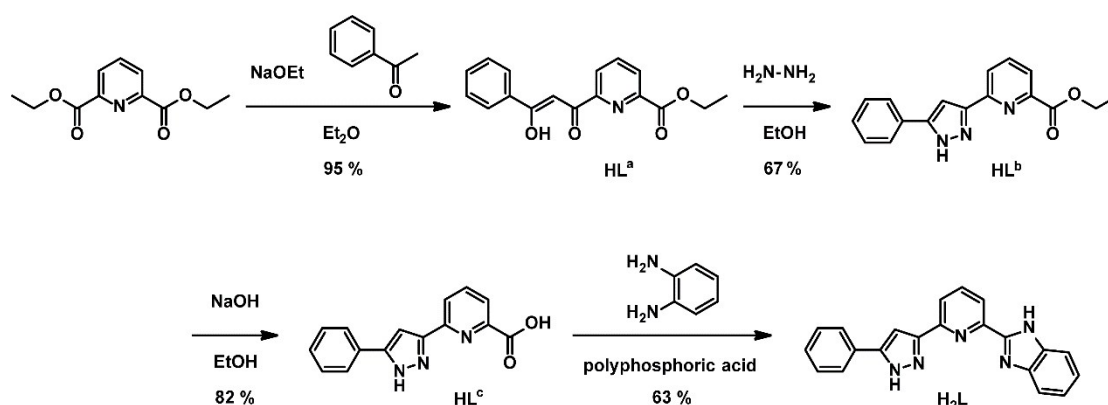**Scheme S1.** Synthetic pathway of  $H_2L$ .

### Synthesis of 6-[1,3-dioxo-3-(2-phenyl)propionyl]pyridine-2-carboxylic acid ethyl ester ( $HL^a$ )<sup>[S2]</sup>

A solution of Na (3.18 g, 138 mmol) in 150 ml ethanol was stirred at room temperature. After stirring, sodium ethoxide was obtained as white solid by evaporation. To this solid, a solution of acetophenone (13.46 g, 112 mmol) and diethyl-2,6-pyridinedicarboxylate (25.00 g, 112 mmol) in diethyl ether were then added. Yellow solid was obtained after 2 h reflux. The solid was separated by filtration, and carefully washed with ether. After drying, the solid was added to 200 ml water and 20 ml of acetic acid was added with stirring. After 24 h stirring, yellow solid was obtained by filtration. Last, the white solid  $HL^a$  was obtained by recrystallization from ethanol. (31.68 g, yield 95 %)  $^1H$  NMR (400 MHz,  $CDCl_3$ ):  $\delta$  1.51 (t, 3H), 4.54 (q, 2H), 7.28 (s, 1H), 7.53 (t, 2H), 7.60 (t, 1H), 7.71 (s, 1H), 8.04 (t, 1H), 8.11 (d, 2H), 8.26 (d, 2H), 8.35 (d, 2H).

### Synthesis of 6-[5-phenyl-1H-pyrazol-3-yl]-pyridine-2-carboxylic acid ethyl ester ( $HL^b$ )

A solution of hydrazine monohdrate (1.798 mL, 37.0 mmol) in 100 mL of ethanol was slowly added in a solution of  $HL^a$  (10 g, 33.6 mmol) in 300 mL of ethanol. The mixture was refluxed for 1 h. After refluxing, the yellow solution was obtained. The solution was evaporated to remove ethanol and brown oil was obtained. Brown oil was dissolved in dichloromethane, and washed by water to remove impurities. After extraction, a pale yellow powder of  $HL^b$  was obtained by evaporation. (6.61 g, yield 67 %) Anal. (calcd.) for  $C_{17.4}H_{16.4}N_3O_{0.3}$  ( $C_{17}H_{15}N_3O_2 \cdot 0.2C_2H_5OH \cdot 0.1H_2O$ ): C,68.57 (68.67); H,5.33 (5.43); N,14.07 (13.81) %.  $^1H$  NMR (400 MHz,  $CDCl_3$ ):  $\delta$  8.35 (d, 2H), 8.26 (d, 2H), 8.11 (d, 2H), 8.04 (t, 1H), 7.71 (s, 1H), 7.60 (t, 1H), 7.53 (t, 2H), 7.28 (s, 1H), 4.54 (q, 2H), 1.51 (t, 3H). FT-IR (KBr,  $cm^{-1}$



<sup>1</sup>): 3470 (s,  $\nu_{\text{N-H}}$ ) 1713 (s,  $\nu_{\text{C=O}}$ )

### Synthesis of 6-[5-phenyl-1H-pyrazol-3-yl]-pyridine-2-carboxylic acid (HL<sup>c</sup>)

A solution of 2 M NaOH in 100 mL of water was added in a solution of HL<sup>b</sup> (3.01 g, 10.3 mmol) in 65 mL ethanol. After addition, the mixture was refluxed at 80 min and evaporated to remove ethanol. The white precipitate was solved in 300 mL H<sub>2</sub>O and washed by dichloromethane to remove impurities. After extraction, the water layer was adjusted pH 8 by 12 M HCl, and stir 2 h at room temperature. White solid of HL<sup>c</sup> was obtained by filtration and drying. The crude compound was used for synthesis of H<sub>2</sub>L. (2.25 g, yield 82 %) Anal. (calcd.) for C<sub>15</sub>H<sub>16</sub>N<sub>3</sub>O<sub>4.5</sub> (C<sub>15</sub>H<sub>11</sub>N<sub>3</sub>O<sub>2</sub>·2.5H<sub>2</sub>O): C,58.21 (58.06); H,4.80 (5.20); N,13.61 (13.54) %. FT-IR (KBr, cm<sup>-1</sup>): 3334 (s,  $\nu_{\text{N-H}}$ ) 1701 (s,  $\nu_{\text{C=O}}$ ) <sup>1</sup>H NMR (400 MHz, CDCl<sub>3</sub>):  $\delta$  7.34 (t, 1H) 7.38 (s,1H) 7.46 (t, 2H) 7.87 (s, 1H) 7.89 (d, 1H) 7.91 (d, 1H) 7.95 (t, 1H) 7.99 (d, 1H). FT-IR (KBr, cm<sup>-1</sup>): 3334 (s,  $\nu_{\text{N-H}}$ ) 1701 (s,  $\nu_{\text{C=O}}$ ).

### Synthesis of 2-[6-[5-(phenyl)-1H-pyrazol-3-yl]-2-pyridinyl]-1H-benzimidazole (H<sub>2</sub>L)

HL<sup>c</sup> (2.10 g, 7.9 mmol) was added in polyphosphoric acid (25 g) at 180 °C and stirred 15 min. After stirring, o-phenylenediamine (0.854 g, 7.9 mmol) was added and stirred 7 h. The resulting dark green oil was added to water and a pale gray/green suspension was obtained. This mixture was adjusted to pH 10 by using 28 % ammonia solution. A dark beige solid was then obtained by filtration. The filtered solid was then re-dissolved in hot acetone and filtered once more to remove impurities. A beige microcrystalline powder of H<sub>2</sub>L was then obtained by evaporation of acetone. (1.68 g, yield 63 %) Anal. (calcd.) for C<sub>21</sub>H<sub>19</sub>N<sub>5</sub>O<sub>2</sub>: C,67.55 (67.85); H,5.13 (5.16); N,18.75 (18.78) %. <sup>1</sup>H NMR (400 MHz, CDCl<sub>3</sub>):  $\delta$  12.96 (s, 1H), 8.22 (d, 1H), 8.10 (t, 1H), 8.02 (d, 1H), 7.92 (d, 2H), 7.76 (d, 1H), 7.67 (d, 1H), 7.63 (s, 1H), 7.51 (t, 2H), 7.39 (t, 1H), 7.34 (t, 1H), 7.29 (t, 1H). FT-IR (KBr, cm<sup>-1</sup>): 3201.8 (s,  $\nu_{\text{N-H}}$ ) 1602.9 (s,  $\nu_{\text{C-H}}$ )

### Synthesis of H<sub>2</sub>L<sup>1</sup>

A beige powder of H<sub>2</sub>L<sup>1</sup> was then obtained by evaporation of acetone. (yield 79.2 %) Anal. (calcd.) for H<sub>2</sub>L<sup>1</sup> · H<sub>2</sub>O (C<sub>22</sub>H<sub>19</sub>N<sub>5</sub>O): C,71.60 (71.53); H,5.36 (5.18); N,18.88 (18.96) %. <sup>1</sup>H NMR (400 MHz, DMSO): 8.22 (d, 1H), 8.09 (t, 1H), 8.01 (d, 1H), 7.80 (d, 2H), 7.76 (d, 1H), 7.67 (d, 1H), 7.58 (s, 1H), 7.31 (m, 4H), 2.37 (s, 3H). FT-IR (KBr, cm<sup>-1</sup>): 3142.0 (s,  $\nu_{\text{N-H}}$ ) 1600.9 (s,  $\nu_{\text{C-H}}$ ).

### Synthesis of H<sub>2</sub>L<sup>2</sup>

A beige powder of H<sub>2</sub>L<sup>2</sup> was then obtained by evaporation of acetone. (yield 37.0 %) Anal. (calcd.) for H<sub>2</sub>L<sup>2</sup> · 0.5H<sub>2</sub>O (C<sub>24</sub>H<sub>22</sub>N<sub>5</sub>O<sub>0.5</sub>): C,74.21 (74.20); H,5.65 (5.71); N,18.22 (18.03) %. <sup>1</sup>H NMR (400 MHz, CDCl<sub>3</sub>):  $\delta$  10.9 (s, 1H), 8.38 (d, 1H), 7.93 (t, 1H), 7.85 (t, 1H), 7.47 (t, 1H), 7.28 (m, 2H), 7.26 (s, 1H), 6.97 (s, 2H), 6.90 (s, 1H), 2.32 (s, 3H), 2.16 (s, 6H).4 FT-IR (KBr, cm<sup>-1</sup>): 3203.8 (s,  $\nu_{\text{N-H}}$ ) 1604.8 (s,  $\nu_{\text{C-H}}$ ).

### Synthesis of H<sub>2</sub>L<sup>3</sup>

A brown powder of H<sub>2</sub>L<sup>3</sup> was then obtained by evaporation of acetone. (yield 41.2 %) Anal. (calcd.) for (H<sub>2</sub>L<sup>3</sup> · H<sub>2</sub>O · 0.8(CH<sub>3</sub>)<sub>2</sub>CO) C<sub>28.4</sub>H<sub>31.8</sub>N<sub>5</sub>O<sub>1.8</sub>: C,72.18 (72.27); H,6.70 (6.79); N,14.97 (14.84) %. <sup>1</sup>H NMR (400 MHz, DMSO):  $\delta$  12.89 (s, 1H), 8.21 (d, 1H), 8.05 (d, 2H), 7.74 (d, 1H), 7.60 (d, 1H), 7.27 (m, 2H), 2.26 (s, 3H), 2.22 (s, 6H). 2.01 (s, 6H), FT-IR (KBr, cm<sup>-1</sup>): 3172.9 (s,  $\nu_{\text{N-H}}$ ) 1599.0 (s,  $\nu_{\text{C-H}}$ ).

## Reference

- [S1] Unpublilshed results (Submitted to *Angew. Chem. Int. Ed.*), T. Shiga, R. Saiki, L. Akiyama, R. Kumai, D. Natke, F. Renz, J.M. Cameron, G.N. Newton and H. Oshio  
[S2] T. Shiga, M. Noguchi, T. Matsumoto, H. Sato, H. Tahira, G.N. Newton, H. Oshio, *Pure Appl. Chem.*, **2011**, *83*, 1721–1729.
